# Supplementary material for: Heteronuclear phosphorescent iridium(iii) complexes with tunable photophysical and excited-state properties by chelating BF2 moiety for application in bioimaging
Source: Royal Society of Chemistry journal article supplement (doi:10.1039/c3ra40639c), 2013-01-01
Supplement: c3ra40639c.pdf [file c3ra40639c.pdf]

## Supporting Information

# Heteronuclear phosphorescent iridium(III) complexes with tunable photophysical and excited-state properties by chelating BF<sub>2</sub> moiety for application in bioimaging

Huibin Sun,<sup>‡a</sup> Lijuan Yang,<sup>‡ac</sup> Huiran Yang,<sup>a</sup> Shujuan Liu,<sup>a</sup> Wenjuan Xu,<sup>a</sup> Xiangmei

Liu,<sup>a</sup> Zhenzhen Tu,<sup>a</sup> Haiquan Su,<sup>b</sup> Qiang Zhao,<sup>\*a</sup> and Wei Huang<sup>\*ab</sup>

<sup>a</sup> *Key Laboratory for Organic Electronics & Information Displays (KLOEID) and Institute of Advanced Materials (IAM), Nanjing University of Posts & Telecommunications (NUPT), 9 Wenyuan Road, Nanjing 210046, P. R. China. Fax: +86 25 8586 6396, Tel: +86 25 8586 6396; wei-huang@njupt.edu.cn; iamqzhao@njupt.edu.cn*

<sup>b</sup> *Jiangsu-Singapore Joint Research Center for Organic/Bio-Electronics and Institute of Advanced Materials, Nanjing University of Technology, Nanjing 211816, China. Fax: +86 25 5813 9988; Tel: +86 25 5813 9001.*

<sup>c</sup> *School of Chemistry and Chemical Engineering, Inner Mongolia University, Hohhot, Inner Mongolia 010021, P. R. China.*

**Table S1** Crystal data and refinement parameters for complex **2b**

|                                  |                                                                                                                      |
|----------------------------------|----------------------------------------------------------------------------------------------------------------------|
| empirical formula                | [IrC <sub>28</sub> H <sub>19</sub> N <sub>3</sub> F <sub>2</sub> BO <sub>3</sub> ](CH <sub>2</sub> Cl <sub>2</sub> ) |
| formula weight                   | 771.42                                                                                                               |
| crystal system                   | orthorhombic crystal system                                                                                          |
| space group                      | Pna2 <sub>1</sub>                                                                                                    |
| a (Å)                            | 12.522(3)                                                                                                            |
| b (Å)                            | 22.397(5)                                                                                                            |
| c (Å)                            | 9.999(2)                                                                                                             |
| V (Å <sup>3</sup> )              | V (Å <sup>3</sup> )                                                                                                  |
| Z                                | 4                                                                                                                    |
| D(calcd) (g cm <sup>-3</sup> )   | 1.827                                                                                                                |
| μ (mm <sup>-1</sup> )            | 5.002                                                                                                                |
| F(000)                           | 1496                                                                                                                 |
| scan type                        | ω-2θ                                                                                                                 |
| R <sub>1</sub> , wR <sub>2</sub> | 0.0266, 0.0681                                                                                                       |
| goodness of fit                  | 1.047                                                                                                                |

**Table S2.** The selected bond length of calculation results of **2b** compared with the X-Ray crystallography results

| Selected bond | X-Ray crystallography results | Calculated bond lengths |
|---------------|-------------------------------|-------------------------|
| Ir1-C11       | 1.994(5)                      | 2.01719                 |
| Ir1-C12       | 1.991(5)                      | 2.00388                 |
| Ir1-N1        | 2.059(4)                      | 2.06565                 |
| Ir1-N2        | 2.036(4)                      | 2.07907                 |
| Ir1-N3        | 2.150(5)                      | 2.22634                 |
| Ir1-O1        | 2.242(3)                      | 2.24965                 |
| B1-O2         | 1.510(10)                     | 1.53785                 |
| B1-O3         | 1.385(10)                     | 1.50508                 |
| B1-F1         | 1.383(12)                     | 1.37448                 |
| B1-F2         | 1.323(11)                     | 1.35901                 |

**Table S3.** HOMOs and LUMOs distributions of **1a-3a** and **1b-3b** at the lowest singlet state

|           | HOMO                                                                                | LUMO                                                                                | LUMO+1                                                                                |
|-----------|-------------------------------------------------------------------------------------|-------------------------------------------------------------------------------------|---------------------------------------------------------------------------------------|
| <b>1a</b> | 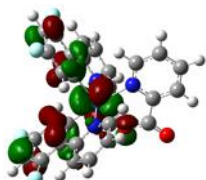 |  |  |
| <b>1b</b> |  |  |  |

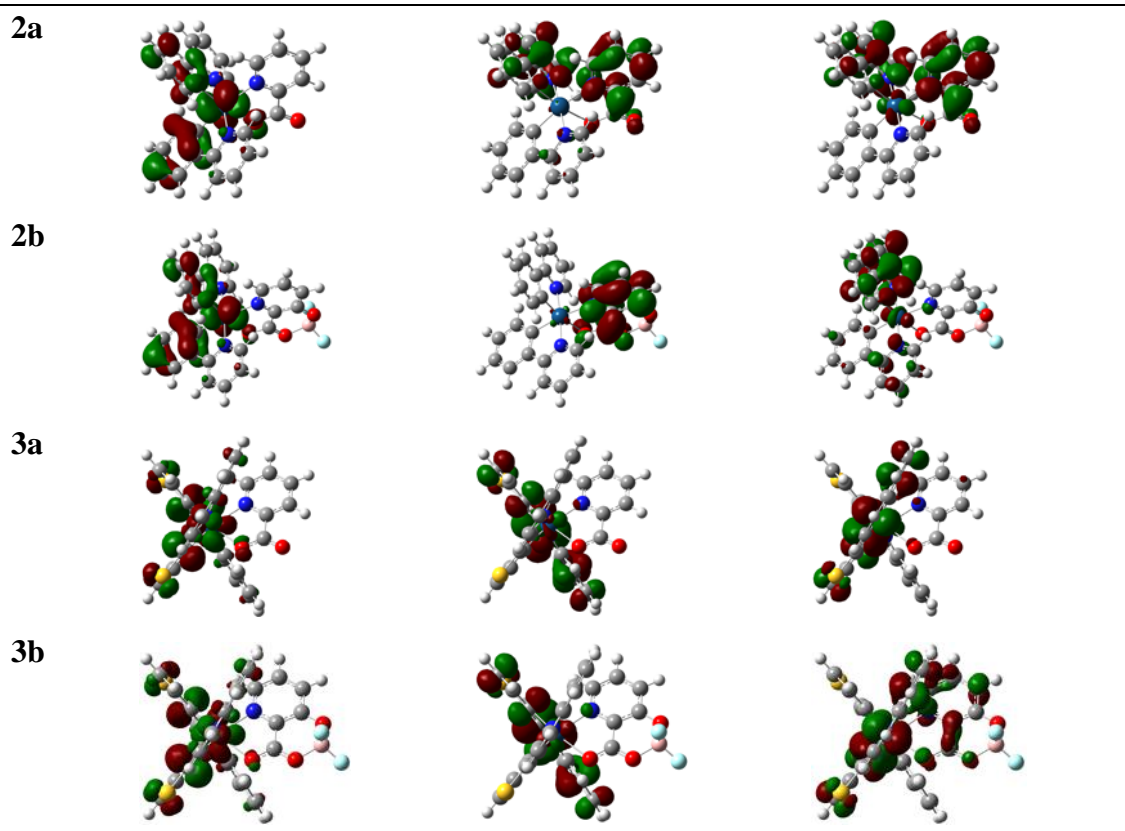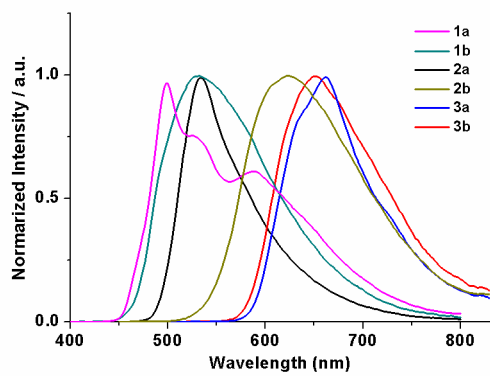

**Fig. S1.** Emission spectra (excited at 365 nm) in solid state.

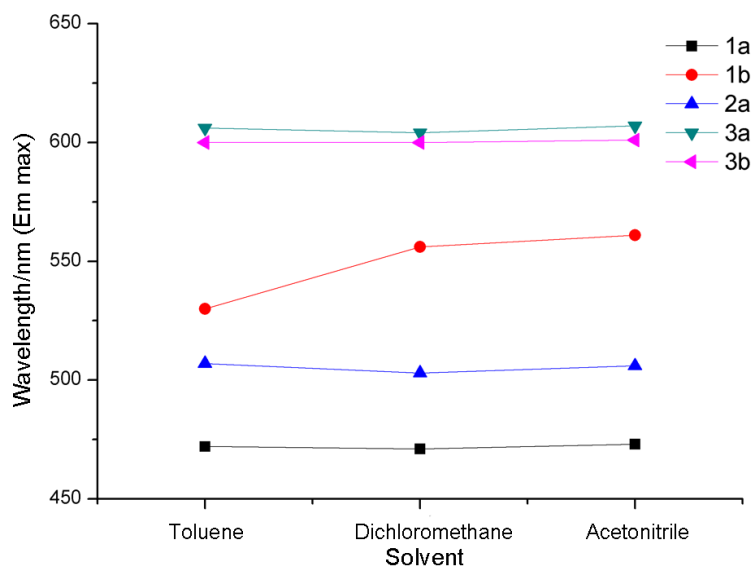

**Fig. S2.** The maximum emission peak changes of the complexes with different solvent.

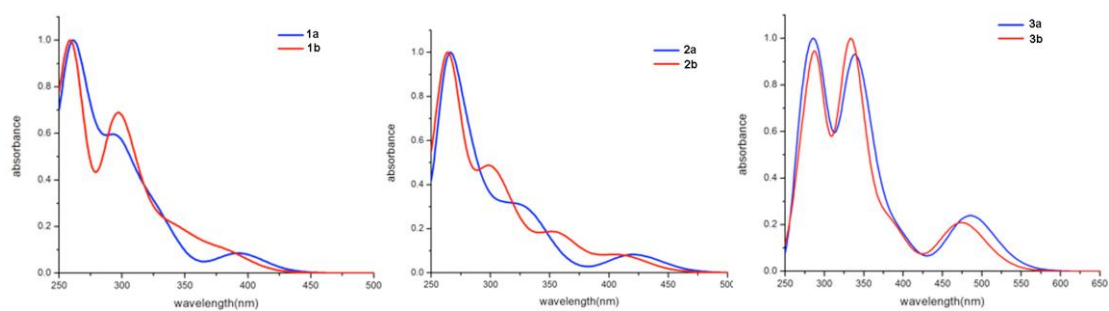

**Fig. S3.** The calculated absorption spectra of **1a-3a** and **1b-3b** in  $\text{CH}_2\text{Cl}_2$  solution.

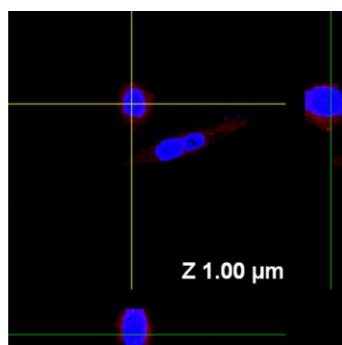

**Fig. S4** overlap Z-scan confocal image of living HeLa cells incubated with **3a** and DAPI.
